# Supplementary material for: A Benchmark Dataset for Evaluating Practical Performance of Model Quality Assessment of Homology Models
Source: MDPI journal article supplement (doi:10.3390/bioengineering9030118), 2022-03-15
Supplement: s1 [file s1]

# Supplementary Materials: A benchmark dataset for evaluating practical performance of model quality assessment of homology models

Yuma Takei <sup>1,2</sup> , and Takashi Ishida <sup>1,\*</sup> 

## 1. Supplementary result

### 1.1. The details of the constructed datasets

#### 1.1.1. The list of 100 targets of the single-domain dataset

**Table S1.** List of 100 targets in the single-domain dataset

| Target  | Length | Class     | Experimental method | Num models | max GDT_TS | med GDT_TS | min GDT_TS |
|---------|--------|-----------|---------------------|------------|------------|------------|------------|
| 2MR9_A  | 40     | All alpha | SOLUTION NMR        | 90         | 0.906      | 0.812      | 0.700      |
| 4G12_A  | 44     | All alpha | X-RAY DIFFRACTION   | 150        | 0.938      | 0.875      | 0.773      |
| 1HTA_A  | 68     | All alpha | X-RAY DIFFRACTION   | 150        | 0.956      | 0.737      | 0.570      |
| 2B5A_A  | 77     | All alpha | X-RAY DIFFRACTION   | 150        | 0.912      | 0.792      | 0.597      |
| 3DMI_A  | 87     | All alpha | X-RAY DIFFRACTION   | 150        | 0.983      | 0.862      | 0.402      |
| 5V93_o  | 87     | All alpha | ELECTRON MICROSCOPY | 150        | 0.954      | 0.828      | 0.422      |
| 6K9F_B  | 87     | All alpha | ELECTRON MICROSCOPY | 150        | 0.919      | 0.825      | 0.402      |
| 1RT8_A  | 102    | All alpha | X-RAY DIFFRACTION   | 150        | 0.919      | 0.739      | 0.529      |
| 2WP2_B  | 110    | All alpha | X-RAY DIFFRACTION   | 150        | 0.993      | 0.849      | 0.718      |
| 1F2E_A  | 121    | All alpha | X-RAY DIFFRACTION   | 150        | 0.979      | 0.746      | 0.506      |
| 1G4I_A  | 123    | All alpha | X-RAY DIFFRACTION   | 150        | 0.965      | 0.880      | 0.740      |
| 3JAI_SS | 137    | All alpha | ELECTRON MICROSCOPY | 150        | 0.936      | 0.693      | 0.411      |
| 1VLK_A  | 142    | All alpha | X-RAY DIFFRACTION   | 95         | 0.849      | 0.555      | 0.405      |
| 1EXR_A  | 146    | All alpha | X-RAY DIFFRACTION   | 150        | 0.781      | 0.500      | 0.402      |
| 4HRR_H  | 150    | All alpha | X-RAY DIFFRACTION   | 150        | 0.903      | 0.627      | 0.522      |
| 6O8W_g  | 154    | All alpha | ELECTRON MICROSCOPY | 150        | 0.881      | 0.753      | 0.563      |
| 5XX9_B  | 157    | All alpha | X-RAY DIFFRACTION   | 150        | 0.986      | 0.770      | 0.584      |
| 2VKE_A  | 162    | All alpha | X-RAY DIFFRACTION   | 114        | 0.918      | 0.616      | 0.479      |
| 3M0G_A  | 283    | All alpha | X-RAY DIFFRACTION   | 150        | 0.959      | 0.793      | 0.657      |
| 3O1D_A  | 298    | All alpha | X-RAY DIFFRACTION   | 150        | 0.973      | 0.644      | 0.502      |
| 4EQF_A  | 312    | All alpha | X-RAY DIFFRACTION   | 81         | 0.915      | 0.765      | 0.400      |
| 1KWF_A  | 363    | All alpha | X-RAY DIFFRACTION   | 150        | 0.778      | 0.565      | 0.404      |
| 4RM4_A  | 375    | All alpha | X-RAY DIFFRACTION   | 150        | 0.894      | 0.730      | 0.636      |
| 3TJ3_A  | 426    | All alpha | X-RAY DIFFRACTION   | 150        | 0.927      | 0.846      | 0.404      |
| 1RE5_A  | 448    | All alpha | X-RAY DIFFRACTION   | 150        | 0.926      | 0.608      | 0.435      |
| 1UTI_A  | 57     | All beta  | X-RAY DIFFRACTION   | 150        | 0.969      | 0.908      | 0.469      |
| 1I4K_A  | 72     | All beta  | X-RAY DIFFRACTION   | 150        | 0.976      | 0.875      | 0.781      |
| 2F2H_A  | 80     | All beta  | X-RAY DIFFRACTION   | 150        | 0.978      | 0.847      | 0.484      |
| 1RHF_A  | 91     | All beta  | X-RAY DIFFRACTION   | 150        | 0.767      | 0.631      | 0.411      |
| 2V90_C  | 93     | All beta  | X-RAY DIFFRACTION   | 150        | 0.908      | 0.829      | 0.611      |
| 1AZ5_A  | 99     | All beta  | X-RAY DIFFRACTION   | 150        | 0.960      | 0.907      | 0.864      |
| 2D9Y_A  | 104    | All beta  | SOLUTION NMR        | 150        | 0.856      | 0.700      | 0.486      |
| 2UUB_Q  | 104    | All beta  | X-RAY DIFFRACTION   | 150        | 0.921      | 0.651      | 0.546      |
| 1V70_A  | 105    | All beta  | X-RAY DIFFRACTION   | 150        | 0.741      | 0.621      | 0.481      |
| 2DS4_A  | 106    | All beta  | SOLUTION NMR        | 150        | 0.811      | 0.652      | 0.554      |
| 4ZPL_A  | 107    | All beta  | X-RAY DIFFRACTION   | 150        | 0.946      | 0.892      | 0.734      |
| 1BQU_A  | 115    | All beta  | X-RAY DIFFRACTION   | 150        | 0.947      | 0.646      | 0.454      |
| 1TW4_A  | 125    | All beta  | X-RAY DIFFRACTION   | 150        | 0.964      | 0.804      | 0.648      |
| 1RSY_A  | 126    | All beta  | X-RAY DIFFRACTION   | 150        | 0.952      | 0.816      | 0.615      |
| 1QNI_A  | 131    | All beta  | X-RAY DIFFRACTION   | 120        | 0.991      | 0.466      | 0.401      |
| 2ZJR_H  | 134    | All beta  | X-RAY DIFFRACTION   | 150        | 0.925      | 0.763      | 0.580      |
| 5JP5_A  | 134    | All beta  | X-RAY DIFFRACTION   | 150        | 0.996      | 0.918      | 0.612      |
| 4V52_BC | 147    | All beta  | X-RAY DIFFRACTION   | 150        | 0.872      | 0.649      | 0.449      |
| 3GM8_A  | 158    | All beta  | X-RAY DIFFRACTION   | 150        | 0.926      | 0.749      | 0.514      |
| 1XWN_A  | 166    | All beta  | SOLUTION NMR        | 150        | 0.756      | 0.712      | 0.664      |
| 3JB4_B  | 166    | All beta  | ELECTRON MICROSCOPY | 150        | 0.955      | 0.711      | 0.408      |
| 1OTJ_A  | 281    | All beta  | X-RAY DIFFRACTION   | 150        | 0.835      | 0.752      | 0.422      |
| 1HAG_E  | 295    | All beta  | X-RAY DIFFRACTION   | 150        | 0.780      | 0.703      | 0.558      |

The table continue to the next page.

**Table S1.** (Continued)

| Target | Length | Class        | Experimental method | Num<br>models | max<br>GDT_TS | med<br>GDT_TS | min<br>GDT_TS |
|--------|--------|--------------|---------------------|---------------|---------------|---------------|---------------|
| 4WE5_A | 321    | All beta     | X-RAY DIFFRACTION   | 150           | 0.972         | 0.718         | 0.631         |
| 1W8O_A | 356    | All beta     | X-RAY DIFFRACTION   | 122           | 0.742         | 0.643         | 0.405         |
| 1S3J_A | 66     | alpha + beta | X-RAY DIFFRACTION   | 150           | 0.961         | 0.867         | 0.590         |
| 6KNA_A | 76     | alpha + beta | SOLUTION NMR        | 150           | 0.757         | 0.706         | 0.556         |
| 2UUB_E | 81     | alpha + beta | X-RAY DIFFRACTION   | 150           | 0.985         | 0.856         | 0.725         |
| 2I2Y_A | 86     | alpha + beta | SOLUTION NMR        | 150           | 0.817         | 0.727         | 0.558         |
| 6SPF_T | 94     | alpha + beta | ELECTRON MICROSCOPY | 150           | 0.936         | 0.761         | 0.572         |
| 5GJH_A | 95     | alpha + beta | X-RAY DIFFRACTION   | 150           | 0.958         | 0.747         | 0.508         |
| 1WLU_A | 116    | alpha + beta | X-RAY DIFFRACTION   | 150           | 0.927         | 0.794         | 0.489         |
| 4IOP_B | 121    | alpha + beta | X-RAY DIFFRACTION   | 150           | 0.884         | 0.800         | 0.622         |
| 1OH0_A | 125    | alpha + beta | X-RAY DIFFRACTION   | 150           | 0.932         | 0.695         | 0.422         |
| 5DE0_C | 135    | alpha + beta | X-RAY DIFFRACTION   | 150           | 0.954         | 0.769         | 0.404         |
| 2C21_A | 139    | alpha + beta | X-RAY DIFFRACTION   | 150           | 0.838         | 0.634         | 0.439         |
| 1AYZ_A | 153    | alpha + beta | X-RAY DIFFRACTION   | 150           | 0.931         | 0.845         | 0.657         |
| 1IFV_A | 155    | alpha + beta | X-RAY DIFFRACTION   | 150           | 0.889         | 0.760         | 0.405         |
| 1HV5_A | 161    | alpha + beta | X-RAY DIFFRACTION   | 77            | 0.862         | 0.758         | 0.401         |
| 1YR0_A | 163    | alpha + beta | X-RAY DIFFRACTION   | 150           | 0.986         | 0.730         | 0.517         |
| 1DE4_A | 178    | alpha + beta | X-RAY DIFFRACTION   | 150           | 0.806         | 0.750         | 0.664         |
| 2BWJ_A | 192    | alpha + beta | X-RAY DIFFRACTION   | 150           | 0.875         | 0.644         | 0.591         |
| 1K28_A | 216    | alpha + beta | X-RAY DIFFRACTION   | 150           | 0.770         | 0.627         | 0.512         |
| 5Y4E_A | 219    | alpha + beta | X-RAY DIFFRACTION   | 150           | 0.874         | 0.607         | 0.486         |
| 1IRU_I | 220    | alpha + beta | X-RAY DIFFRACTION   | 150           | 0.925         | 0.782         | 0.624         |
| 6CD6_A | 287    | alpha + beta | X-RAY DIFFRACTION   | 150           | 0.963         | 0.745         | 0.515         |
| 5JT8_A | 310    | alpha + beta | X-RAY DIFFRACTION   | 150           | 0.744         | 0.653         | 0.532         |
| 2V2F_F | 384    | alpha + beta | X-RAY DIFFRACTION   | 150           | 0.972         | 0.520         | 0.403         |
| 2DKF_A | 431    | alpha + beta | X-RAY DIFFRACTION   | 150           | 0.725         | 0.607         | 0.429         |
| 6KWQ_A | 462    | alpha + beta | X-RAY DIFFRACTION   | 150           | 0.976         | 0.894         | 0.458         |
| 1ST9_A | 113    | alpha / beta | X-RAY DIFFRACTION   | 150           | 0.982         | 0.754         | 0.440         |
| 3CRN_A | 121    | alpha / beta | X-RAY DIFFRACTION   | 150           | 0.916         | 0.832         | 0.461         |
| 4NYN_A | 133    | alpha / beta | X-RAY DIFFRACTION   | 150           | 0.906         | 0.559         | 0.419         |
| 2DYK_A | 161    | alpha / beta | X-RAY DIFFRACTION   | 150           | 0.823         | 0.660         | 0.485         |
| 1UB7_A | 172    | alpha / beta | X-RAY DIFFRACTION   | 150           | 0.909         | 0.850         | 0.646         |
| 1OHE_A | 182    | alpha / beta | X-RAY DIFFRACTION   | 150           | 0.844         | 0.561         | 0.403         |
| 2CNW_D | 191    | alpha / beta | X-RAY DIFFRACTION   | 150           | 0.980         | 0.842         | 0.679         |
| 2P6R_A | 202    | alpha / beta | X-RAY DIFFRACTION   | 150           | 0.771         | 0.585         | 0.477         |
| 3GFO_A | 222    | alpha / beta | X-RAY DIFFRACTION   | 150           | 0.812         | 0.718         | 0.570         |
| 2HSZ_A | 224    | alpha / beta | X-RAY DIFFRACTION   | 150           | 0.771         | 0.603         | 0.406         |
| 4EFH_A | 227    | alpha / beta | X-RAY DIFFRACTION   | 150           | 0.992         | 0.906         | 0.401         |
| 4NBU_B | 243    | alpha / beta | X-RAY DIFFRACTION   | 150           | 0.963         | 0.882         | 0.717         |
| 4KE6_E | 246    | alpha / beta | X-RAY DIFFRACTION   | 150           | 0.997         | 0.587         | 0.460         |
| 1KA9_F | 251    | alpha / beta | X-RAY DIFFRACTION   | 145           | 0.957         | 0.781         | 0.520         |
| 3HRX_A | 254    | alpha / beta | X-RAY DIFFRACTION   | 150           | 0.891         | 0.768         | 0.664         |
| 4PNE_B | 270    | alpha / beta | X-RAY DIFFRACTION   | 150           | 0.752         | 0.529         | 0.411         |
| 4M1Q_B | 312    | alpha / beta | X-RAY DIFFRACTION   | 150           | 0.919         | 0.829         | 0.741         |
| 5CZJ_B | 319    | alpha / beta | X-RAY DIFFRACTION   | 150           | 0.998         | 0.559         | 0.413         |
| 2CYB_B | 320    | alpha / beta | X-RAY DIFFRACTION   | 150           | 0.834         | 0.706         | 0.419         |
| 2YV3_A | 328    | alpha / beta | X-RAY DIFFRACTION   | 150           | 0.895         | 0.698         | 0.401         |
| 1I0D_A | 331    | alpha / beta | X-RAY DIFFRACTION   | 131           | 0.999         | 0.751         | 0.418         |
| 1V2F_A | 368    | alpha / beta | X-RAY DIFFRACTION   | 150           | 0.825         | 0.743         | 0.601         |
| 2GH9_A | 378    | alpha / beta | X-RAY DIFFRACTION   | 150           | 0.794         | 0.665         | 0.427         |
| 1EA9_C | 382    | alpha / beta | X-RAY DIFFRACTION   | 150           | 0.947         | 0.782         | 0.590         |
| 3RHH_C | 476    | alpha / beta | X-RAY DIFFRACTION   | 150           | 0.952         | 0.794         | 0.632         |

The first column represents the target ID. The target ID is composed of the PDB ID and the chain name, but does not necessarily refer to the entire chain because the target sequence was selected based on the SCOP domain classification. The second column indicates the sequence length. The third column represents the SCOP structural class based on the secondary structure. The forth column represents the experimental method for structure determination. The fifth column represents the number of predicted structure models for the target. The sixth, seventh, and eighth columns represent the maximum, median, and minimum GDT\_TS values of the structure models, respectively.

### 1.1.2. The list of 100 targets of the multi-domain dataset

The list of 100 targets of the multi-domain dataset selected from PISCES is shown in the table S2.

**Table S2.** List of 100 targets in the multi-domain dataset

| Target | Length | Num domains | Experimental method | Num models | max GDT_TS | med GDT_TS | min GDT_TS |
|--------|--------|-------------|---------------------|------------|------------|------------|------------|
| 1L3K_A | 196    | 2           | X-RAY DIFFRACTION   | 150        | 1.000      | 0.441      | 0.400      |
| 3P2T_A | 196    | 2           | X-RAY DIFFRACTION   | 150        | 0.741      | 0.613      | 0.450      |
| 5Y9Z_A | 199    | 2           | X-RAY DIFFRACTION   | 150        | 0.992      | 0.725      | 0.641      |
| 4YI8_A | 201    | 2           | X-RAY DIFFRACTION   | 150        | 0.952      | 0.635      | 0.415      |
| 3R2Q_A | 202    | 2           | X-RAY DIFFRACTION   | 150        | 0.898      | 0.652      | 0.444      |
| 2IBD_A | 204    | 2           | X-RAY DIFFRACTION   | 150        | 0.874      | 0.514      | 0.403      |
| 1VI0_A | 206    | 2           | X-RAY DIFFRACTION   | 150        | 0.995      | 0.602      | 0.402      |
| 4D5C_A | 206    | 2           | X-RAY DIFFRACTION   | 150        | 0.963      | 0.808      | 0.402      |
| 3LYP_B | 215    | 2           | X-RAY DIFFRACTION   | 150        | 0.985      | 0.745      | 0.478      |
| 4BVX_A | 215    | 2           | X-RAY DIFFRACTION   | 145        | 0.959      | 0.472      | 0.409      |
| 4I8H_A | 223    | 2           | X-RAY DIFFRACTION   | 150        | 0.983      | 0.904      | 0.719      |
| 4XH2_G | 228    | 2           | X-RAY DIFFRACTION   | 150        | 0.934      | 0.723      | 0.589      |
| 6HOA_A | 228    | 2           | X-RAY DIFFRACTION   | 138        | 1.000      | 0.510      | 0.406      |
| 4IW9_A | 231    | 2           | X-RAY DIFFRACTION   | 150        | 0.798      | 0.606      | 0.431      |
| 5K7F_A | 231    | 2           | X-RAY DIFFRACTION   | 150        | 0.725      | 0.603      | 0.404      |
| 4KQP_A | 232    | 2           | X-RAY DIFFRACTION   | 150        | 0.950      | 0.699      | 0.458      |
| 4PQH_A | 236    | 2           | X-RAY DIFFRACTION   | 150        | 0.924      | 0.596      | 0.452      |
| 3K6Y_A | 237    | 2           | X-RAY DIFFRACTION   | 150        | 0.830      | 0.551      | 0.404      |
| 4EQ9_A | 246    | 2           | X-RAY DIFFRACTION   | 150        | 0.934      | 0.648      | 0.429      |
| 5WJP_A | 249    | 2           | X-RAY DIFFRACTION   | 150        | 0.707      | 0.568      | 0.501      |
| 4MF5_A | 256    | 2           | X-RAY DIFFRACTION   | 150        | 0.957      | 0.745      | 0.546      |
| 4YKI_A | 256    | 2           | X-RAY DIFFRACTION   | 150        | 0.913      | 0.797      | 0.449      |
| 3PFG_A | 263    | 2           | X-RAY DIFFRACTION   | 150        | 0.924      | 0.483      | 0.405      |
| 1K5N_A | 276    | 2           | X-RAY DIFFRACTION   | 150        | 0.998      | 0.929      | 0.798      |
| 4U19_A | 276    | 2           | X-RAY DIFFRACTION   | 150        | 0.946      | 0.627      | 0.533      |
| 4CFS_A | 287    | 2           | X-RAY DIFFRACTION   | 140        | 1.000      | 0.504      | 0.402      |
| 1X8B_A | 289    | 2           | X-RAY DIFFRACTION   | 150        | 0.923      | 0.691      | 0.516      |
| 4WPG_A | 289    | 2           | X-RAY DIFFRACTION   | 150        | 0.840      | 0.628      | 0.417      |
| 3WS7_A | 306    | 2           | X-RAY DIFFRACTION   | 150        | 0.957      | 0.676      | 0.471      |
| 6G7N_A | 318    | 2           | X-RAY DIFFRACTION   | 150        | 0.947      | 0.604      | 0.400      |
| 1FHU_A | 320    | 2           | X-RAY DIFFRACTION   | 134        | 0.981      | 0.498      | 0.404      |
| 4EUO_A | 320    | 2           | X-RAY DIFFRACTION   | 150        | 0.779      | 0.514      | 0.400      |
| 2IZR_A | 330    | 2           | X-RAY DIFFRACTION   | 150        | 0.934      | 0.834      | 0.419      |
| 4EQB_A | 330    | 2           | X-RAY DIFFRACTION   | 150        | 0.843      | 0.504      | 0.400      |
| 5GXE_A | 331    | 2           | X-RAY DIFFRACTION   | 150        | 0.919      | 0.580      | 0.415      |
| 4NTC_A | 335    | 2           | X-RAY DIFFRACTION   | 150        | 0.842      | 0.551      | 0.402      |
| 4YUC_A | 335    | 2           | X-RAY DIFFRACTION   | 150        | 0.939      | 0.666      | 0.517      |
| 2XXG_A | 336    | 2           | X-RAY DIFFRACTION   | 92         | 0.975      | 0.671      | 0.401      |
| 1R6D_A | 337    | 2           | X-RAY DIFFRACTION   | 150        | 0.923      | 0.745      | 0.633      |
| 3IJL_A | 338    | 2           | X-RAY DIFFRACTION   | 150        | 0.769      | 0.590      | 0.519      |
| 4LJ6_A | 339    | 2           | X-RAY DIFFRACTION   | 150        | 0.837      | 0.661      | 0.411      |
| 5DP2_A | 342    | 2           | X-RAY DIFFRACTION   | 150        | 0.902      | 0.640      | 0.504      |
| 4TMX_A | 345    | 2           | X-RAY DIFFRACTION   | 121        | 0.784      | 0.697      | 0.401      |
| 1SVS_A | 353    | 2           | X-RAY DIFFRACTION   | 150        | 0.998      | 0.881      | 0.668      |
| 1RKX_A | 357    | 2           | X-RAY DIFFRACTION   | 150        | 0.914      | 0.581      | 0.455      |
| 3PJ0_A | 359    | 2           | X-RAY DIFFRACTION   | 140        | 0.949      | 0.516      | 0.414      |
| 1GU7_A | 364    | 2           | X-RAY DIFFRACTION   | 97         | 0.717      | 0.434      | 0.400      |
| 1LC5_A | 364    | 2           | X-RAY DIFFRACTION   | 150        | 0.786      | 0.617      | 0.447      |
| 4H27_A | 364    | 2           | X-RAY DIFFRACTION   | 150        | 0.928      | 0.634      | 0.481      |
| 1YQD_A | 366    | 2           | X-RAY DIFFRACTION   | 150        | 0.984      | 0.719      | 0.563      |
| 2CDC_B | 366    | 2           | X-RAY DIFFRACTION   | 150        | 0.818      | 0.508      | 0.400      |
| 3NYT_A | 367    | 2           | X-RAY DIFFRACTION   | 150        | 0.920      | 0.796      | 0.404      |
| 2JHF_B | 374    | 2           | X-RAY DIFFRACTION   | 150        | 0.995      | 0.866      | 0.514      |
| 4C08_A | 382    | 2           | X-RAY DIFFRACTION   | 150        | 0.975      | 0.753      | 0.400      |
| 4HVK_A | 382    | 2           | X-RAY DIFFRACTION   | 150        | 0.903      | 0.697      | 0.449      |
| 3KGW_A | 393    | 2           | X-RAY DIFFRACTION   | 150        | 0.949      | 0.717      | 0.451      |
| 4JN7_A | 395    | 2           | X-RAY DIFFRACTION   | 150        | 0.749      | 0.668      | 0.591      |
| 2HEU_A | 401    | 2           | X-RAY DIFFRACTION   | 116        | 0.965      | 0.416      | 0.400      |
| 2DKJ_A | 407    | 2           | X-RAY DIFFRACTION   | 150        | 0.950      | 0.902      | 0.665      |

The table continue to the next page.

**Table S2.** (Continued)

| Target | Length | Num domains | Experimental method | Num models | max GDT_TS | med GDT_TS | min GDT_TS |
|--------|--------|-------------|---------------------|------------|------------|------------|------------|
| 5V8S_A | 410    | 2           | X-RAY DIFFRACTION   | 109        | 0.713      | 0.645      | 0.436      |
| 4RY1_A | 411    | 2           | X-RAY DIFFRACTION   | 150        | 0.813      | 0.464      | 0.402      |
| 3G7Q_A | 417    | 2           | X-RAY DIFFRACTION   | 150        | 0.863      | 0.523      | 0.414      |
| 5DVI_A | 419    | 2           | X-RAY DIFFRACTION   | 102        | 0.909      | 0.448      | 0.408      |
| 4WLH_A | 422    | 2           | X-RAY DIFFRACTION   | 150        | 0.921      | 0.672      | 0.409      |
| 3SQZ_A | 425    | 2           | X-RAY DIFFRACTION   | 150        | 0.903      | 0.737      | 0.401      |
| 2W8T_A | 427    | 2           | X-RAY DIFFRACTION   | 150        | 0.974      | 0.698      | 0.401      |
| 3PPL_A | 427    | 2           | X-RAY DIFFRACTION   | 150        | 0.954      | 0.456      | 0.401      |
| 4R6H_A | 428    | 2           | X-RAY DIFFRACTION   | 77         | 0.720      | 0.426      | 0.400      |
| 6D0A_A | 431    | 2           | X-RAY DIFFRACTION   | 150        | 0.740      | 0.571      | 0.455      |
| 3PIU_A | 435    | 2           | X-RAY DIFFRACTION   | 150        | 0.934      | 0.550      | 0.431      |
| 4C3S_A | 445    | 2           | X-RAY DIFFRACTION   | 150        | 0.925      | 0.543      | 0.429      |
| 4JBE_A | 445    | 2           | X-RAY DIFFRACTION   | 75         | 0.774      | 0.439      | 0.400      |
| 3QGU_B | 449    | 2           | X-RAY DIFFRACTION   | 150        | 0.939      | 0.588      | 0.481      |
| 5IPY_A | 453    | 2           | X-RAY DIFFRACTION   | 80         | 0.978      | 0.608      | 0.514      |
| 4G68_A | 456    | 2           | X-RAY DIFFRACTION   | 150        | 0.729      | 0.537      | 0.405      |
| 4G8T_A | 464    | 2           | X-RAY DIFFRACTION   | 150        | 0.999      | 0.863      | 0.400      |
| 1HM9_B | 468    | 2           | X-RAY DIFFRACTION   | 150        | 0.913      | 0.743      | 0.638      |
| 5JRY_A | 485    | 2           | X-RAY DIFFRACTION   | 150        | 0.992      | 0.785      | 0.586      |
| 3A09_A | 490    | 2           | X-RAY DIFFRACTION   | 61         | 0.967      | 0.682      | 0.401      |
| 5U3A_A | 496    | 2           | X-RAY DIFFRACTION   | 150        | 0.999      | 0.770      | 0.401      |
| 3V4C_A | 528    | 2           | X-RAY DIFFRACTION   | 150        | 0.874      | 0.530      | 0.401      |
| 5ICQ_A | 610    | 2           | X-RAY DIFFRACTION   | 55         | 0.825      | 0.430      | 0.401      |
| 4A5S_A | 740    | 2           | X-RAY DIFFRACTION   | 150        | 0.975      | 0.635      | 0.409      |
| 1ZAR_A | 282    | 3           | X-RAY DIFFRACTION   | 100        | 0.707      | 0.589      | 0.417      |
| 3VRD_B | 401    | 3           | X-RAY DIFFRACTION   | 150        | 0.933      | 0.474      | 0.401      |
| 4RD4_A | 415    | 3           | X-RAY DIFFRACTION   | 150        | 0.901      | 0.653      | 0.406      |
| 4EQS_A | 437    | 3           | X-RAY DIFFRACTION   | 150        | 0.828      | 0.707      | 0.402      |
| 4DCU_A | 456    | 3           | X-RAY DIFFRACTION   | 70         | 0.984      | 0.470      | 0.419      |
| 3DK9_A | 478    | 3           | X-RAY DIFFRACTION   | 150        | 0.923      | 0.837      | 0.711      |
| 6RI6_A | 498    | 3           | X-RAY DIFFRACTION   | 150        | 0.991      | 0.957      | 0.432      |
| 6FME_B | 506    | 3           | X-RAY DIFFRACTION   | 146        | 0.720      | 0.506      | 0.420      |
| 2WSD_A | 513    | 3           | X-RAY DIFFRACTION   | 150        | 0.749      | 0.542      | 0.402      |
| 5FS8_A | 515    | 3           | X-RAY DIFFRACTION   | 150        | 0.973      | 0.499      | 0.401      |
| 3VQT_A | 548    | 3           | X-RAY DIFFRACTION   | 150        | 0.900      | 0.430      | 0.402      |
| 3AJ7_A | 589    | 3           | X-RAY DIFFRACTION   | 150        | 0.817      | 0.658      | 0.411      |
| 2BHU_A | 602    | 3           | X-RAY DIFFRACTION   | 125        | 0.767      | 0.694      | 0.400      |
| 3AML_A | 755    | 3           | X-RAY DIFFRACTION   | 150        | 0.963      | 0.553      | 0.405      |
| 3CLK_A | 1039   | 3           | X-RAY DIFFRACTION   | 150        | 0.803      | 0.689      | 0.613      |
| 3NA5_A | 570    | 4           | X-RAY DIFFRACTION   | 150        | 0.994      | 0.460      | 0.400      |
| 3UCQ_A | 655    | 4           | X-RAY DIFFRACTION   | 67         | 0.819      | 0.416      | 0.401      |

The first column represents the ID of the target. The target ID is composed of the PDB ID and the chain name. The second column indicates the sequence length. The third column represents the number of the domains. The fourth column represents the experimental method of structure determination. The fifth column represents the number of predicted structure models in the target. The sixth, seventh, and eighth columns represent the maximum, median, and minimum GDT\_TS values of the structure models, respectively.

### 1.1.3. The distribution of the sequence length

The distribution of the sequence lengths of the targets included in each dataset is shown in Figure S1. Multi-domain targets are composed of multiple domains, therefore the overall sequence length is longer than that of single-domain targets. The minimum sequence length of the single-domain dataset is 40 and the maximum is 476. The minimum sequence length of the multi-domain dataset is 196, and the maximum is 1039.

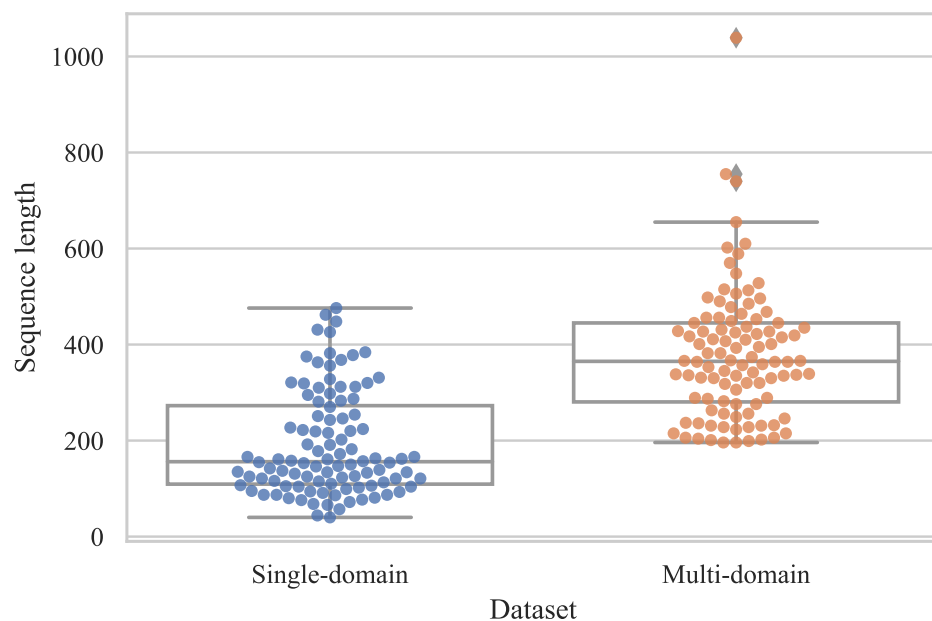

**Figure S1.** The box plot and swarm plot of the sequence length for each dataset. A single point represents a single target.

#### 1.1.4. The distribution of the GDT\_TS of the models for each target

The distribution of GDT\_TS of the model for each target in the single-domain dataset is shown in Figure S2, and that of the multi-domain dataset in Figure S3. Most of the targets in the single-domain dataset had an unbiased distribution of GDT\_TS. However, for a few targets, such as '1DA9\_C' and '1XWN\_A', the range of the distribution of the GDT\_TS is narrow. In the multi-domain dataset, for about 20% of the total targets, the models are polarized into a few models with higher GDT\_TS and other lower models.

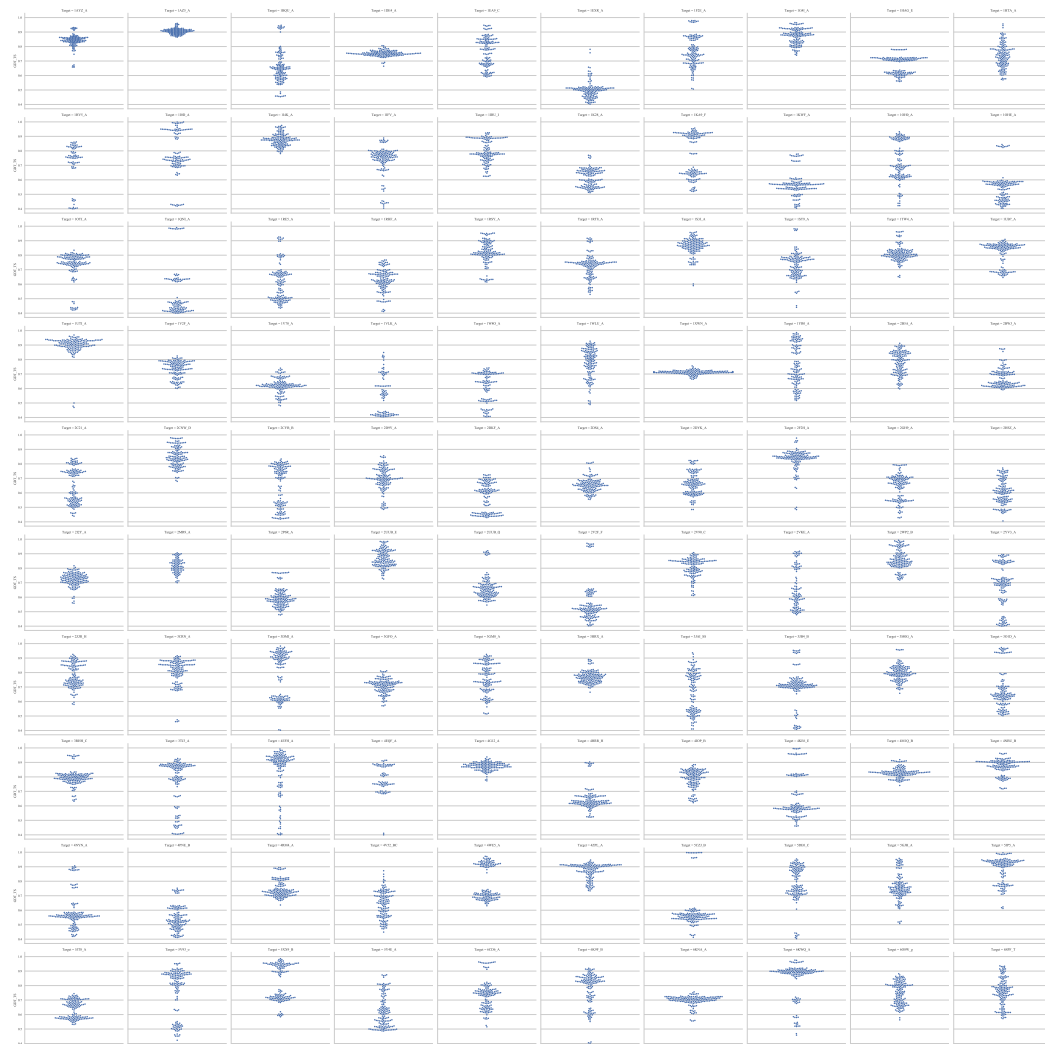

**Figure S2.** The swarm plot of the GDT\_TS for each target of single-domain dataset. A single point represents a single model. The range of GDT\_TS in the plot is 0.4 to 1.

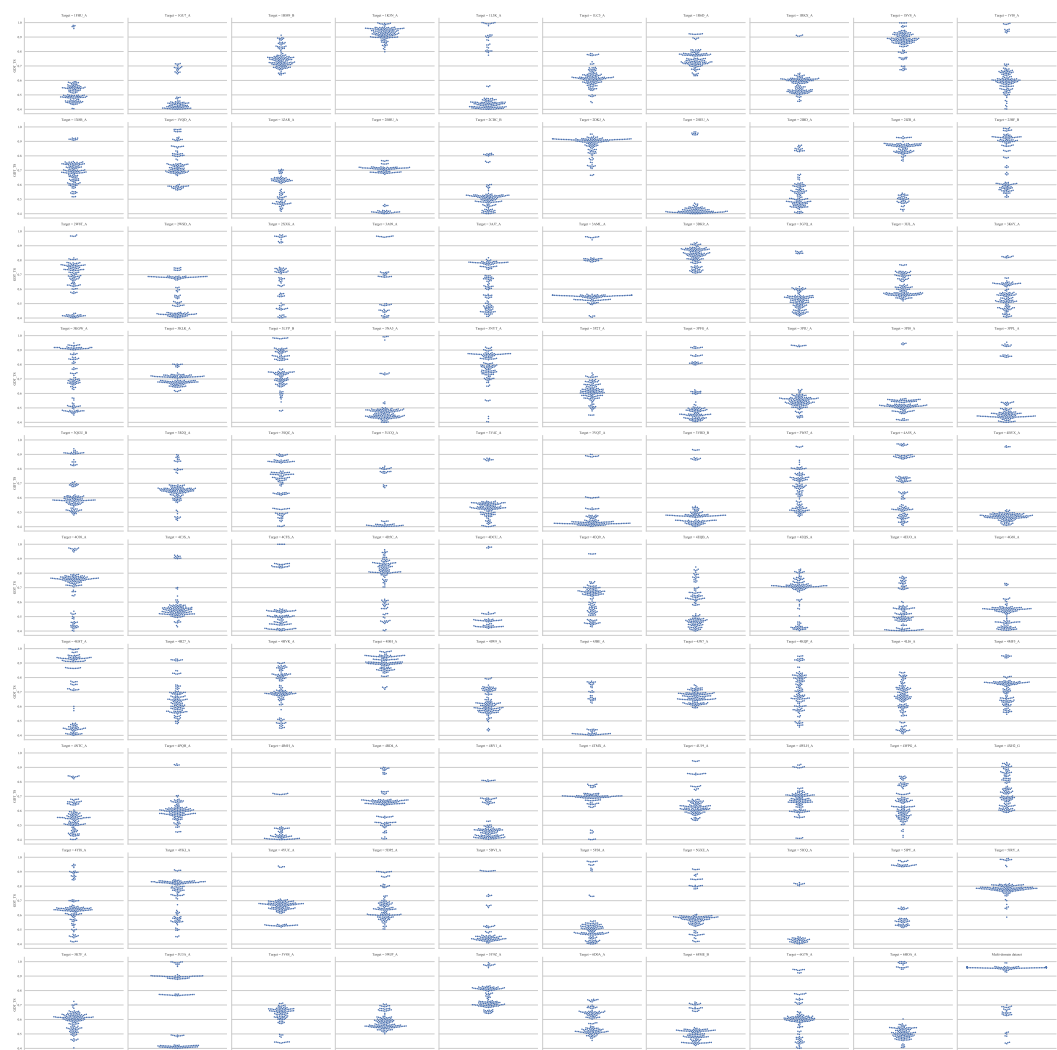

**Figure S3.** The swarm plot of the GDT\_TS for each target of Multi-domain dataset.

### 1.1.5. Comparison to CASP dataset

We compare the constructed datasets with CASP11-13 [1–3], which are often used as a test dataset in MQA research. The CASP dataset for MQA is divided into stage1 and stage2, and stage2 is used in this comparison.

The results of the comparison for each dataset regarding the number of targets with the maximum GDT\_TS value above the threshold are shown in Table S3. From this table, we can see that the number of targets with GDT\_TS greater than 0.7 do not differ significantly between the three datasets, but as we increase the threshold of GDT\_TS, the number of targets in the CASP dataset is less than that in the constructed datasets. In particular, for the number of targets with GDT\_TS greater than 0.9, there is a considerable difference between the constructed datasets and the CASP dataset. Therefore, we were able to construct the datasets with more targets that contain high accurate models compared to the CASP dataset.

**Table S3.** Number of targets for which the maximum GDT\_TS value exceeds the threshold in each dataset

| Dataset       | All | Threshold of the maximum GDT_TS |     |     |
|---------------|-----|---------------------------------|-----|-----|
|               |     | 0.7                             | 0.8 | 0.9 |
| Single-domain | 100 | 100                             | 85  | 63  |
| Multi-domain  | 100 | 100                             | 81  | 64  |
| CASP11-13     | 239 | 87                              | 54  | 19  |

The first column indicates the dataset name. The second column represents the number of targets in the entire dataset. Columns 3 to 5 show the number of targets for which the maximum GDT\_TS exceeds the threshold.

### 1.1.6. Differences in the quality of the models with the same template

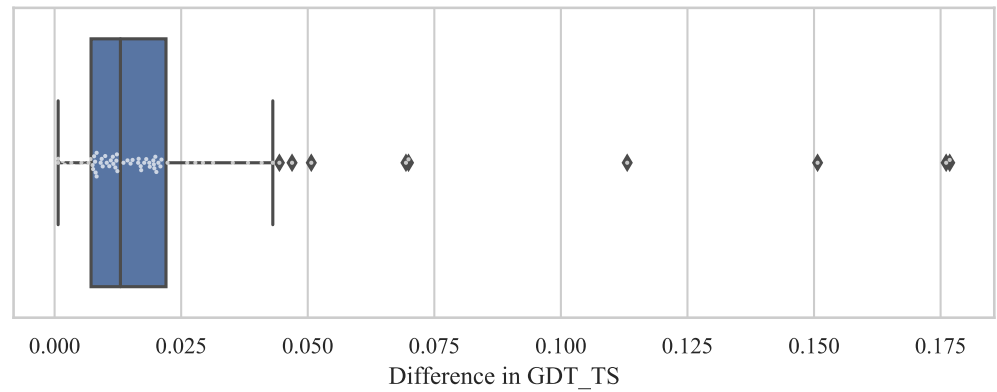

**Figure S4.** The box plot and the swarm plot of the difference in GDT\_TS between the best and the worst models from the same template and alignment for the single-domain dataset. Only the template of the model with the highest GDT\_TS in each target is shown. A white point represents a template.



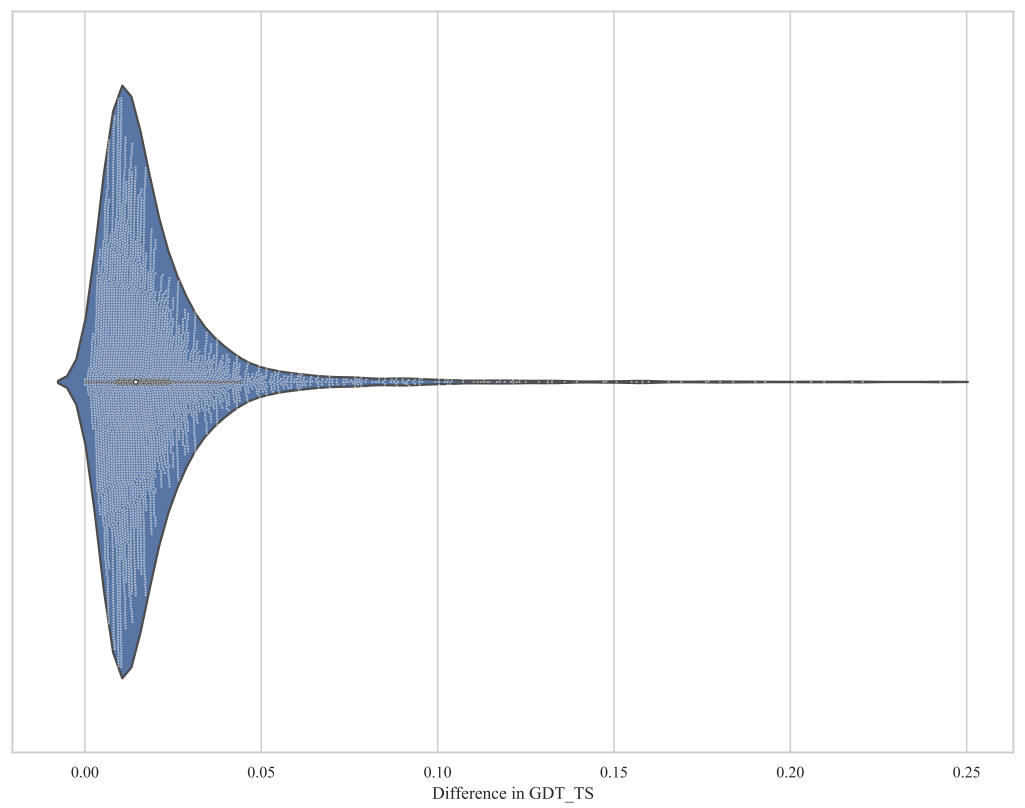

**Figure S5.** The violin plot and the swarm plot of the difference in GDT\_TS between the best and the worst models from the same template and alignment for the single-domain dataset. A white point represents a template.

## 1.2. MQA Performance evaluation for the constructed dataset

**Table S4.** MQA performance for the single-domain dataset

| Method          | Loss                                                 | MAE                                                        | Pearson                                                    | Spearman                                                   |
|-----------------|------------------------------------------------------|------------------------------------------------------------|------------------------------------------------------------|------------------------------------------------------------|
| identity(%)     | 4.096<br>(-)                                         | (0.371)<br>(-)                                             | 0.636<br>(-)                                               | 0.507<br>(-)                                               |
| positive(%)     | 4.902<br>( $2.87 \times 10^{-01}$ )                  | (0.215)<br><b>(<math>7.79 \times 10^{-18}</math>)</b>      | 0.661<br><b>(<math>1.65 \times 10^{-05}</math>)</b>        | 0.540<br><b>(<math>8.25 \times 10^{-05}</math>)</b>        |
| coverage(%)     | 10.068<br><b>(<math>3.46 \times 10^{-10}</math>)</b> | (0.211)<br><b>(<math>3.12 \times 10^{-13}</math>)</b>      | 0.438<br><b>(<math>7.00 \times 10^{-08}</math>)</b>        | 0.359<br><b>(<math>6.88 \times 10^{-06}</math>)</b>        |
| DOPE            | 4.013<br>( $7.39 \times 10^{-01}$ )                  | -<br>(-)                                                   | 0.745<br><b>(<math>4.75 \times 10^{-05}</math>)</b>        | 0.675<br><b>(<math>1.11 \times 10^{-09}</math>)</b>        |
| SOAP            | 3.818<br>( $3.36 \times 10^{-01}$ )                  | -<br>(-)                                                   | 0.642<br>( $8.47 \times 10^{-01}$ )                        | 0.603<br><b>(<math>3.86 \times 10^{-05}</math>)</b>        |
| ProQ3D          | 4.562<br>( $7.18 \times 10^{-01}$ )                  | 0.129<br><b>(<math>1.46 \times 10^{-17}</math>)</b>        | 0.725<br><b>(<math>2.10 \times 10^{-04}</math>)</b>        | 0.663<br><b>(<math>4.03 \times 10^{-09}</math>)</b>        |
| SBROD           | 5.797<br>( $2.30 \times 10^{-02}$ )                  | -<br>(-)                                                   | 0.676<br>( $6.58 \times 10^{-02}$ )                        | 0.613<br><b>(<math>5.58 \times 10^{-05}</math>)</b>        |
| P3CMQA          | <b>3.091</b><br>( $1.70 \times 10^{-02}$ )           | <b>0.096</b><br><b>(<math>6.50 \times 10^{-18}</math>)</b> | <b>0.838</b><br><b>(<math>4.56 \times 10^{-13}</math>)</b> | <b>0.777</b><br><b>(<math>5.05 \times 10^{-15}</math>)</b> |
| DeepAccNet      | 3.288<br>( $2.97 \times 10^{-02}$ )                  | 0.238<br><b>(<math>6.66 \times 10^{-16}</math>)</b>        | 0.748<br><b>(<math>9.77 \times 10^{-07}</math>)</b>        | 0.675<br><b>(<math>3.30 \times 10^{-11}</math>)</b>        |
| DeepAccNet-Bert | 3.372<br>( $2.78 \times 10^{-02}$ )                  | 0.173<br><b>(<math>2.79 \times 10^{-17}</math>)</b>        | 0.821<br><b>(<math>3.01 \times 10^{-11}</math>)</b>        | 0.754<br><b>(<math>5.49 \times 10^{-14}</math>)</b>        |

The first column represents the method name. The second column shows the average GDT\_TS loss of the selected models for each target. The values are multiplied by 100 for clarity. The third column shows the average mean absolute error (MAE) between the GDT\_TS and estimated scores per target. The fourth and fifth columns show the average Pearson and Spearman correlation coefficients for each target, respectively. The values in parentheses in the second line of each method are the p-values (calculated by the Wilcoxon signed-rank test against identity). The MAE values for identity, positive, and coverage are given in parentheses because they are not scores that directly predict the quality of the model structures. The best values are in bold.

**Table S5.** MQA performance for the multi-domain dataset

| Method          | Loss                                       | MAE                                        | Pearson                                    | Spearman                                   |
|-----------------|--------------------------------------------|--------------------------------------------|--------------------------------------------|--------------------------------------------|
| identity(%)     | 4.885<br>(-)                               | (0.318)<br>(-)                             | 0.787<br>(-)                               | 0.551<br>(-)                               |
| positive(%)     | 4.410<br>( $4.75 \times 10^{-02}$ )        | (0.171)<br>( $4.27 \times 10^{-18}$ )      | 0.805<br>( $1.51 \times 10^{-03}$ )        | 0.577<br>( $3.14 \times 10^{-03}$ )        |
| coverage(%)     | 16.252<br>( $6.64 \times 10^{-10}$ )       | (0.285)<br>( $1.72 \times 10^{-02}$ )      | 0.424<br>( $2.40 \times 10^{-16}$ )        | 0.387<br>( $1.52 \times 10^{-05}$ )        |
| DOPE            | 2.468<br>( $3.07 \times 10^{-03}$ )        | -<br>(-)                                   | 0.809<br>( $2.61 \times 10^{-01}$ )        | 0.712<br>( $4.08 \times 10^{-08}$ )        |
| SOAP            | 2.921<br>( $1.03 \times 10^{-03}$ )        | -<br>(-)                                   | 0.741<br>( $1.17 \times 10^{-03}$ )        | 0.620<br>( $9.15 \times 10^{-03}$ )        |
| ProQ3D          | 3.587<br>( $1.65 \times 10^{-02}$ )        | 0.095<br>( $8.27 \times 10^{-18}$ )        | 0.817<br>( $7.55 \times 10^{-02}$ )        | 0.723<br>( $7.55 \times 10^{-08}$ )        |
| SBROD           | 3.684<br>( $6.06 \times 10^{-02}$ )        | -<br>(-)                                   | 0.785<br>( $2.88 \times 10^{-01}$ )        | 0.676<br>( $8.14 \times 10^{-05}$ )        |
| P3CMQA          | <b>1.884</b><br>( $4.29 \times 10^{-05}$ ) | <b>0.075</b><br>( $7.56 \times 10^{-18}$ ) | <b>0.884</b><br>( $4.90 \times 10^{-11}$ ) | <b>0.802</b><br>( $2.34 \times 10^{-15}$ ) |
| DeepAccNet      | 2.873<br>( $2.52 \times 10^{-02}$ )        | 0.194<br>( $2.71 \times 10^{-17}$ )        | 0.858<br>( $6.35 \times 10^{-09}$ )        | 0.734<br>( $1.31 \times 10^{-10}$ )        |
| DeepAccNet-Bert | 2.760<br>( $7.28 \times 10^{-04}$ )        | 0.142<br>( $1.41 \times 10^{-17}$ )        | 0.882<br>( $4.66 \times 10^{-10}$ )        | 0.788<br>( $6.60 \times 10^{-14}$ )        |

The legends are the same as those in Table S4.

### 1.3. MQA Performance evaluation when RMSD is used as a label

The results of the MQA performance when RMSD is used as a label are shown in Table S6 and S7. RMSD was calculated using PyMOL[4].

The performance of the deep learning-based method was the best, as it was when GDT\_TS was used as a label. However, on the single domain dataset, identity and DOPE were not significantly different from the deep learning-based method for loss.

**Table S6.** MQA performance for the single-domain dataset with RMSD as a label

| Method          | RMSD Loss     | RMSD Pearson  | RMSD Spearman |
|-----------------|---------------|---------------|---------------|
| identity(%)     | -0.290        | -0.506        | -0.484        |
| positive(%)     | -0.515        | -0.529        | -0.491        |
| coverage(%)     | -0.947        | -0.334        | -0.277        |
| DOPE            | -0.290        | -0.629        | -0.586        |
| SOAP            | -0.353        | -0.555        | -0.559        |
| ProQ3D          | -0.417        | -0.603        | -0.572        |
| SBROD           | -0.497        | -0.559        | -0.535        |
| P3CMQA          | -0.310        | <b>-0.692</b> | -0.645        |
| DeepAccNet      | <b>-0.227</b> | -0.621        | -0.613        |
| DeepAccNet-Bert | -0.368        | -0.686        | <b>-0.664</b> |

The first column represents the method name. The second column shows the average RMSD loss of the selected models for each target. The smaller the RMSD is, the less difference there is between the predicted structure and the ground truth structure, thus loss takes a negative value, and the closer to zero it is, the better. The third and fourth columns show the average Pearson and Spearman correlation coefficients for each target, respectively. Similar to loss, Pearson and Spearman also take negative values, and larger absolute values indicate stronger correlation. The best values are in bold.

**Table S7.** MQA performance for the multi-domain dataset with RMSD as a label

| Method          | RMSD Loss     | RMSD Pearson  | RMSD Spearman |
|-----------------|---------------|---------------|---------------|
| identity(%)     | -0.420        | -0.673        | -0.534        |
| positive(%)     | -0.392        | -0.690        | -0.547        |
| coverage(%)     | -1.326        | -0.372        | -0.312        |
| DOPE            | -0.188        | -0.702        | -0.623        |
| SOAP            | -0.228        | -0.632        | -0.560        |
| ProQ3D          | -0.314        | -0.711        | -0.634        |
| SBROD           | -0.354        | -0.689        | -0.600        |
| P3CMQA          | <b>-0.154</b> | <b>-0.769</b> | <b>-0.705</b> |
| DeepAccNet      | -0.223        | -0.730        | -0.665        |
| DeepAccNet-Bert | -0.218        | -0.759        | -0.694        |

The legends are the same as those in Table S6.

#### 1.4. Situation-specific MQA performance

**Table S8.** MQA performance for each category based on the distribution of identity for the single-domain dataset

| Category         | Num targets | Method          | Loss         | Pearson      | Spearman     |
|------------------|-------------|-----------------|--------------|--------------|--------------|
| Single top       | 9           | identity(%)     | <b>1.900</b> | 0.709        | 0.511        |
|                  |             | positive(%)     | <b>1.900</b> | 0.734        | 0.554        |
|                  |             | coverage(%)     | 9.505        | 0.618        | 0.432        |
|                  |             | DOPE            | 3.213        | 0.886        | 0.741        |
|                  |             | SOAP            | 2.862        | 0.782        | 0.697        |
|                  |             | ProQ3D          | 4.348        | 0.877        | 0.744        |
|                  |             | SBROD           | 3.390        | 0.813        | 0.698        |
|                  |             | P3CMQA          | 3.833        | <b>0.926</b> | <b>0.821</b> |
|                  |             | DeepAccNet      | 3.573        | 0.855        | 0.757        |
|                  |             | DeepAccNet-Bert | 2.539        | 0.914        | 0.808        |
| Multi top        | 41          | identity(%)     | 3.177        | 0.661        | 0.481        |
|                  |             | positive(%)     | 3.659        | 0.693        | 0.533        |
|                  |             | coverage(%)     | 9.828        | 0.445        | 0.360        |
|                  |             | DOPE            | 3.499        | 0.735        | 0.665        |
|                  |             | SOAP            | 3.276        | 0.641        | 0.591        |
|                  |             | ProQ3D          | 4.064        | 0.699        | 0.660        |
|                  |             | SBROD           | 6.046        | 0.658        | 0.597        |
|                  |             | P3CMQA          | 2.459        | <b>0.822</b> | <b>0.769</b> |
|                  |             | DeepAccNet      | <b>2.070</b> | 0.752        | 0.671        |
|                  |             | DeepAccNet-Bert | 3.159        | 0.817        | 0.752        |
| No identical top | 50          | identity(%)     | 5.244        | 0.602        | 0.528        |
|                  |             | positive(%)     | 6.461        | 0.623        | 0.542        |
|                  |             | coverage(%)     | 10.366       | 0.400        | 0.345        |
|                  |             | DOPE            | 4.578        | 0.727        | 0.672        |
|                  |             | SOAP            | 4.435        | 0.618        | 0.596        |
|                  |             | ProQ3D          | 5.008        | 0.718        | 0.651        |
|                  |             | SBROD           | 6.026        | 0.666        | 0.611        |
|                  |             | P3CMQA          | <b>3.475</b> | <b>0.836</b> | <b>0.775</b> |
|                  |             | DeepAccNet      | 4.237        | 0.725        | 0.664        |
|                  |             | DeepAccNet-Bert | 3.697        | 0.807        | 0.745        |

The first column represents the category name based on the distribution of sequence identity. The second column shows the number of the targets for each category. The third column shows the method name. The fourth, fifth, and sixth columns represent GDT\_TS loss, Pearson correlation coefficients, Spearman correlation coefficients. The best values in each category are shown in bold.

**Table S9.** MQA performance for each category based on the distribution of identity for the multi-domain dataset

| Category         | Num targets | Method          | Loss         | Pearson      | Spearman     |
|------------------|-------------|-----------------|--------------|--------------|--------------|
| Single top       | 20          | identity(%)     | 0.751        | 0.829        | 0.410        |
|                  |             | positive(%)     | 0.751        | 0.837        | 0.452        |
|                  |             | coverage(%)     | 16.930       | 0.470        | 0.400        |
|                  |             | DOPE            | 1.703        | 0.857        | 0.702        |
|                  |             | SOAP            | <b>0.691</b> | 0.779        | 0.565        |
|                  |             | ProQ3D          | 4.221        | 0.829        | 0.694        |
|                  |             | SBROD           | 2.178        | 0.794        | 0.675        |
|                  |             | P3CMQA          | 0.890        | 0.895        | <b>0.798</b> |
|                  |             | DeepAccNet      | 1.102        | 0.901        | 0.722        |
|                  |             | DeepAccNet-Bert | 0.972        | <b>0.920</b> | <b>0.798</b> |
| Multi top        | 34          | identity(%)     | 3.067        | 0.854        | 0.575        |
|                  |             | positive(%)     | 2.900        | 0.867        | 0.609        |
|                  |             | coverage(%)     | 18.513       | 0.417        | 0.389        |
|                  |             | DOPE            | 2.494        | 0.838        | 0.723        |
|                  |             | SOAP            | 2.317        | 0.779        | 0.634        |
|                  |             | ProQ3D          | 3.299        | 0.848        | 0.743        |
|                  |             | SBROD           | 2.778        | 0.824        | 0.691        |
|                  |             | P3CMQA          | <b>2.275</b> | 0.906        | <b>0.810</b> |
|                  |             | DeepAccNet      | 3.129        | 0.910        | 0.750        |
|                  |             | DeepAccNet-Bert | 2.624        | <b>0.925</b> | 0.803        |
| No identical top | 46          | identity(%)     | 8.026        | 0.720        | 0.595        |
|                  |             | positive(%)     | 7.118        | 0.746        | 0.608        |
|                  |             | coverage(%)     | 14.286       | 0.410        | 0.379        |
|                  |             | DOPE            | 2.783        | 0.768        | 0.708        |
|                  |             | SOAP            | 4.338        | 0.696        | 0.633        |
|                  |             | ProQ3D          | 3.525        | 0.790        | 0.722        |
|                  |             | SBROD           | 5.009        | 0.753        | 0.666        |
|                  |             | P3CMQA          | <b>2.027</b> | <b>0.862</b> | <b>0.797</b> |
|                  |             | DeepAccNet      | 3.453        | 0.800        | 0.728        |
|                  |             | DeepAccNet-Bert | 3.639        | 0.833        | 0.773        |

The legends are the same as those in Table S8.

**Table S10.** MQA performance for each category based on the maximum identity for the single-domain dataset

| Category | Num targets | Method          | Loss         | Pearson      | Spearman     |
|----------|-------------|-----------------|--------------|--------------|--------------|
| High     | 24          | identity(%)     | <b>4.357</b> | 0.726        | 0.581        |
|          |             | positive(%)     | 4.788        | 0.751        | 0.607        |
|          |             | coverage(%)     | 10.483       | 0.472        | 0.390        |
|          |             | DOPE            | 5.675        | 0.711        | 0.611        |
|          |             | SOAP            | 5.667        | 0.670        | 0.585        |
|          |             | ProQ3D          | 6.376        | 0.659        | 0.605        |
|          |             | SBROD           | 7.622        | 0.627        | 0.546        |
|          |             | P3CMQA          | 5.377        | <b>0.814</b> | <b>0.731</b> |
|          |             | DeepAccNet      | 5.014        | 0.732        | 0.636        |
|          |             | DeepAccNet-Bert | 5.760        | 0.762        | 0.672        |
| Mid-high | 23          | identity(%)     | 3.544        | 0.652        | 0.498        |
|          |             | positive(%)     | 4.014        | 0.682        | 0.536        |
|          |             | coverage(%)     | 8.516        | 0.489        | 0.408        |
|          |             | DOPE            | 3.428        | 0.782        | 0.725        |
|          |             | SOAP            | 3.157        | 0.685        | 0.660        |
|          |             | ProQ3D          | 4.543        | 0.753        | 0.703        |
|          |             | SBROD           | 4.497        | 0.716        | 0.680        |
|          |             | P3CMQA          | <b>1.981</b> | <b>0.866</b> | <b>0.814</b> |
|          |             | DeepAccNet      | 2.336        | 0.776        | 0.712        |
|          |             | DeepAccNet-Bert | 3.056        | 0.848        | 0.781        |
| Mid-low  | 39          | identity(%)     | 3.969        | 0.623        | 0.504        |
|          |             | positive(%)     | 4.679        | 0.643        | 0.541        |
|          |             | coverage(%)     | 10.736       | 0.404        | 0.318        |
|          |             | DOPE            | 3.345        | 0.738        | 0.678        |
|          |             | SOAP            | 2.876        | 0.626        | 0.595        |
|          |             | ProQ3D          | 4.413        | 0.731        | 0.669        |
|          |             | SBROD           | 6.078        | 0.678        | 0.607        |
|          |             | P3CMQA          | 2.695        | 0.825        | 0.772        |
|          |             | DeepAccNet      | 2.758        | 0.731        | 0.659        |
|          |             | DeepAccNet-Bert | <b>2.598</b> | <b>0.830</b> | <b>0.773</b> |
| Low      | 14          | identity(%)     | 4.908        | 0.491        | 0.402        |
|          |             | positive(%)     | 7.175        | 0.525        | 0.426        |
|          |             | coverage(%)     | 10.044       | 0.392        | 0.341        |
|          |             | DOPE            | 3.987        | 0.761        | 0.696        |
|          |             | SOAP            | 4.357        | 0.570        | 0.561        |
|          |             | ProQ3D          | <b>1.896</b> | 0.771        | 0.681        |
|          |             | SBROD           | 4.020        | 0.688        | 0.636        |
|          |             | P3CMQA          | 2.096        | <b>0.870</b> | <b>0.808</b> |
|          |             | DeepAccNet      | 3.373        | 0.776        | 0.725        |
|          |             | DeepAccNet-Bert | 1.954        | 0.851        | 0.796        |

The first column represents the name of the category based on the maximum value of identity per target. The second column shows the number of the targets for each category. The third column shows the method name. The fourth, fifth, and sixth columns represent GDT\_TS loss, Pearson correlation coefficients, Spearman correlation coefficients.

**Table S11.** MQA performance for each category based on the maximum identity for the multi-domain dataset

| Category | Num targets | Method          | Loss         | Pearson      | Spearman     |
|----------|-------------|-----------------|--------------|--------------|--------------|
| High     | 31          | identity(%)     | 3.290        | 0.811        | 0.487        |
|          |             | positive(%)     | 2.680        | 0.824        | 0.513        |
|          |             | coverage(%)     | 17.769       | 0.459        | 0.379        |
|          |             | DOPE            | 2.860        | 0.823        | 0.711        |
|          |             | SOAP            | 1.935        | 0.807        | 0.660        |
|          |             | ProQ3D          | 5.325        | 0.807        | 0.700        |
|          |             | SBROD           | 4.539        | 0.772        | 0.656        |
|          |             | P3CMQA          | <b>2.495</b> | 0.864        | <b>0.768</b> |
|          |             | DeepAccNet      | 2.592        | 0.867        | 0.740        |
|          |             | DeepAccNet-Bert | 2.941        | <b>0.873</b> | 0.756        |
| Mid-high | 22          | identity(%)     | 2.751        | 0.836        | 0.649        |
|          |             | positive(%)     | 2.778        | 0.843        | 0.664        |
|          |             | coverage(%)     | 10.589       | 0.520        | 0.495        |
|          |             | DOPE            | 1.818        | 0.859        | 0.756        |
|          |             | SOAP            | 1.919        | 0.777        | 0.630        |
|          |             | ProQ3D          | 2.300        | 0.842        | 0.727        |
|          |             | SBROD           | 3.266        | 0.803        | 0.702        |
|          |             | P3CMQA          | <b>1.353</b> | <b>0.908</b> | <b>0.818</b> |
|          |             | DeepAccNet      | 2.198        | 0.874        | 0.733        |
|          |             | DeepAccNet-Bert | 2.452        | 0.890        | 0.802        |
| Mid-low  | 30          | identity(%)     | 6.620        | 0.808        | 0.567        |
|          |             | positive(%)     | 6.031        | 0.809        | 0.578        |
|          |             | coverage(%)     | 18.288       | 0.392        | 0.375        |
|          |             | DOPE            | 2.721        | 0.809        | 0.694        |
|          |             | SOAP            | 3.364        | 0.742        | 0.610        |
|          |             | ProQ3D          | 2.728        | 0.828        | 0.740        |
|          |             | SBROD           | 2.491        | 0.799        | 0.680        |
|          |             | P3CMQA          | <b>2.106</b> | 0.883        | <b>0.802</b> |
|          |             | DeepAccNet      | 3.103        | 0.867        | 0.717        |
|          |             | DeepAccNet-Bert | 2.882        | <b>0.894</b> | 0.793        |
| Low      | 17          | identity(%)     | 7.493        | 0.645        | 0.513        |
|          |             | positive(%)     | 6.819        | 0.717        | 0.580        |
|          |             | coverage(%)     | 17.220       | 0.293        | 0.281        |
|          |             | DOPE            | 2.152        | 0.722        | 0.688        |
|          |             | SOAP            | 5.235        | 0.570        | 0.551        |
|          |             | ProQ3D          | 3.599        | 0.787        | 0.733        |
|          |             | SBROD           | 4.772        | 0.764        | 0.675        |
|          |             | P3CMQA          | <b>1.065</b> | <b>0.891</b> | <b>0.842</b> |
|          |             | DeepAccNet      | 3.851        | 0.802        | 0.755        |
|          |             | DeepAccNet-Bert | 2.614        | 0.866        | 0.819        |

The first column represents the name of the category based on the maximum value of identity per target. The second column shows the number of the targets for the category. The third column shows the method name. The fourth, fifth, and sixth columns represent GDT\_TS loss, Pearson correlation coefficients, Spearman correlation coefficients.



**Table S12.** MQA performance for each class of the single-domain dataset

| Class        | Num targets | Method          | Loss   | MAE   | Pearson | Spearman |
|--------------|-------------|-----------------|--------|-------|---------|----------|
| All alpha    | 25          | identity(%)     | 5.518  | 0.378 | 0.662   | 0.568    |
|              |             | positive(%)     | 5.820  | 0.231 | 0.693   | 0.600    |
|              |             | coverage(%)     | 9.829  | 0.206 | 0.475   | 0.462    |
|              |             | DOPE            | 4.795  | -     | 0.702   | 0.664    |
|              |             | SOAP            | 3.866  | -     | 0.615   | 0.577    |
|              |             | ProQ3D          | 6.134  | 0.178 | 0.652   | 0.607    |
|              |             | SBROD           | 5.898  | -     | 0.642   | 0.595    |
|              |             | P3CMQA          | 4.489  | 0.106 | 0.805   | 0.762    |
|              |             | DeepAccNet      | 3.159  | 0.265 | 0.702   | 0.634    |
|              |             | DeepAccNet-Bert | 3.658  | 0.190 | 0.768   | 0.722    |
| All beta     | 25          | identity(%)     | 3.289  | 0.374 | 0.604   | 0.449    |
|              |             | positive(%)     | 4.563  | 0.217 | 0.638   | 0.504    |
|              |             | coverage(%)     | 8.740  | 0.192 | 0.478   | 0.315    |
|              |             | DOPE            | 3.780  | -     | 0.754   | 0.663    |
|              |             | SOAP            | 4.271  | -     | 0.623   | 0.607    |
|              |             | ProQ3D          | 3.094  | 0.122 | 0.716   | 0.652    |
|              |             | SBROD           | 6.379  | -     | 0.634   | 0.566    |
|              |             | P3CMQA          | 2.280  | 0.095 | 0.853   | 0.792    |
|              |             | DeepAccNet      | 3.458  | 0.230 | 0.754   | 0.681    |
|              |             | DeepAccNet-Bert | 4.279  | 0.170 | 0.827   | 0.749    |
| alpha + beta | 25          | identity(%)     | 4.098  | 0.369 | 0.544   | 0.428    |
|              |             | positive(%)     | 5.567  | 0.213 | 0.582   | 0.454    |
|              |             | coverage(%)     | 11.477 | 0.209 | 0.436   | 0.340    |
|              |             | DOPE            | 3.326  | -     | 0.753   | 0.671    |
|              |             | SOAP            | 3.049  | -     | 0.637   | 0.591    |
|              |             | ProQ3D          | 5.402  | 0.123 | 0.752   | 0.673    |
|              |             | SBROD           | 6.072  | -     | 0.709   | 0.645    |
|              |             | P3CMQA          | 3.356  | 0.100 | 0.837   | 0.763    |
|              |             | DeepAccNet      | 3.554  | 0.226 | 0.739   | 0.674    |
|              |             | DeepAccNet-Bert | 2.533  | 0.170 | 0.827   | 0.748    |
| alpha / beta | 25          | identity(%)     | 3.479  | 0.365 | 0.733   | 0.583    |
|              |             | positive(%)     | 3.657  | 0.199 | 0.733   | 0.601    |
|              |             | coverage(%)     | 10.225 | 0.237 | 0.364   | 0.318    |
|              |             | DOPE            | 4.152  | -     | 0.769   | 0.702    |
|              |             | SOAP            | 4.086  | -     | 0.694   | 0.637    |
|              |             | ProQ3D          | 3.616  | 0.095 | 0.779   | 0.720    |
|              |             | SBROD           | 4.840  | -     | 0.718   | 0.646    |
|              |             | P3CMQA          | 2.237  | 0.084 | 0.859   | 0.790    |
|              |             | DeepAccNet      | 2.983  | 0.232 | 0.797   | 0.710    |
|              |             | DeepAccNet-Bert | 3.019  | 0.162 | 0.860   | 0.796    |

The first column represents the name of the class defined in SCOP. The second column shows the number of the targets.

**Table S13.** MQA performance for each number of domains of the multi-domain dataset

| Num domains | Num targets | Method          | Loss   | MAE   | Pearson | Spearman |
|-------------|-------------|-----------------|--------|-------|---------|----------|
| 2           | 83          | identity(%)     | 4.910  | 0.327 | 0.769   | 0.542    |
|             |             | positive(%)     | 4.328  | 0.177 | 0.791   | 0.571    |
|             |             | coverage(%)     | 16.223 | 0.281 | 0.402   | 0.366    |
|             |             | DOPE            | 2.338  | -     | 0.803   | 0.706    |
|             |             | SOAP            | 2.807  | -     | 0.733   | 0.613    |
|             |             | ProQ3D          | 3.017  | 0.096 | 0.814   | 0.723    |
|             |             | SBROD           | 3.892  | -     | 0.777   | 0.678    |
|             |             | P3CMQA          | 1.736  | 0.075 | 0.877   | 0.799    |
|             |             | DeepAccNet      | 2.829  | 0.198 | 0.852   | 0.730    |
| 3           | 15          | DeepAccNet-Bert | 2.736  | 0.138 | 0.877   | 0.790    |
|             |             | identity(%)     | 5.063  | 0.282 | 0.874   | 0.591    |
|             |             | positive(%)     | 5.123  | 0.143 | 0.871   | 0.604    |
|             |             | coverage(%)     | 14.947 | 0.296 | 0.543   | 0.485    |
|             |             | DOPE            | 3.289  | -     | 0.834   | 0.759    |
|             |             | SOAP            | 3.627  | -     | 0.760   | 0.651    |
|             |             | ProQ3D          | 7.132  | 0.095 | 0.816   | 0.724    |
|             |             | SBROD           | 2.608  | -     | 0.812   | 0.671    |
|             |             | P3CMQA          | 2.955  | 0.078 | 0.906   | 0.815    |
| 4           | 2           | DeepAccNet      | 3.032  | 0.176 | 0.874   | 0.756    |
|             |             | DeepAccNet-Bert | 2.798  | 0.164 | 0.896   | 0.781    |
|             |             | identity(%)     | 2.486  | 0.241 | 0.906   | 0.622    |
|             |             | positive(%)     | 2.486  | 0.111 | 0.907   | 0.614    |
|             |             | coverage(%)     | 27.234 | 0.376 | 0.449   | 0.497    |
|             |             | DOPE            | 1.740  | -     | 0.897   | 0.599    |
|             |             | SOAP            | 2.365  | -     | 0.919   | 0.648    |
|             |             | ProQ3D          | 0.655  | 0.090 | 0.969   | 0.735    |
|             |             | SBROD           | 3.145  | -     | 0.936   | 0.646    |
|             |             | P3CMQA          | 0.000  | 0.068 | 0.977   | 0.821    |
|             |             | DeepAccNet      | 3.490  | 0.176 | 0.966   | 0.741    |
|             |             | DeepAccNet-Bert | 3.490  | 0.149 | 0.964   | 0.752    |

The first column represents the number of the domains. The second column shows the number of the targets.

---

## References

1. Moulton, J.; Fidelis, K.; Kryzhafovych, A.; Schwede, T.; Tramontano, A. Critical assessment of methods of protein structure prediction: Progress and new directions in round XI. *Proteins: Structure, Function, and Bioinformatics* **2016**, *84*, 4–14. doi:10.1002/prot.25064.
2. Moulton, J.; Fidelis, K.; Kryzhafovych, A.; Schwede, T.; Tramontano, A.; Topf, M.; Fidelis, K.; Moulton, J.; Fidelis, K.; Kryzhafovych, A.; et al. Critical assessment of methods of protein structure prediction (CASP)—Round XII. *Proteins: Structure, Function, and Bioinformatics* **2018**, *86*, 7–15. doi:10.1002/prot.25415.
3. Kryzhafovych, A.; Schwede, T.; Topf, M.; Fidelis, K.; Moulton, J. Critical assessment of methods of protein structure prediction (CASP)—Round XIII. *Proteins: Structure, Function, and Bioinformatics* **2019**, *87*, 1011–1020. doi:10.1002/prot.25823.
4. Schrödinger, LLC. The PyMOL Molecular Graphics System, Version 1.8.
